# Supplementary material
Source: HighWire-hosted journal article supplement (https://erj.ersjournals.com/content/55/5/2000700)
Supplement: inline-supplementary-material-1 [file inline-supplementary-material-1.pdf]

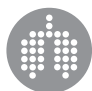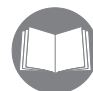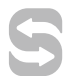

SHAREABLE PDF

# Which patients are SaPHe in sarcoidosis-associated pulmonary hypertension?

Daniel Vis<sup>1,2</sup>, Athénaïs Boucly<sup>3,4,5</sup>, Marc Humbert <sup>3,4,5</sup> and Jason Weatherald <sup>1,6</sup>

**Affiliations:** <sup>1</sup>Dept of Medicine, Division of Respiriology, University of Calgary, Calgary, AB, Canada. <sup>2</sup>Royal Brompton Hospital, London, UK. <sup>3</sup>Université Paris-Saclay, Faculty of Medicine, Le Kremlin-Bicêtre, France. <sup>4</sup>Assistance Publique - Hôpitaux de Paris [AP-HP], Dept of Respiratory and Intensive Care Medicine, Pulmonary Hypertension National Referral Center, Hôpital Bicêtre, Le Kremlin-Bicêtre, France. <sup>5</sup>INSERM UMR\_S 999, Hôpital Marie Lannelongue, Le Plessis-Robinson, France. <sup>6</sup>Libin Cardiovascular Institute of Alberta, Calgary, AB, Canada.

**Correspondence:** Jason Weatherald, Peter Lougheed Centre, 3500 26 Ave NE, Calgary, Alberta, Canada, T1Y 6J4. E-mail: [jcweather@ucalgary.ca](mailto:jcweather@ucalgary.ca)

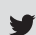

@ERSpublications

**Pre-capillary pulmonary hypertension is a rare and heterogenous complication in sarcoidosis. 6-min walking distance is a robust and consistent prognostic factor, but the role of pulmonary arterial hypertension-targeted treatments remains controversial.** <http://bit.ly/2J27Yps>

**Cite this article as:** Vis D, Boucly A, Humbert M, *et al.* Which patients are SaPHe in sarcoidosis-associated pulmonary hypertension? *Eur Respir J* 2020; 55: 2000700 [<https://doi.org/10.1183/13993003.00700-2020>].

This single-page version can be shared freely online.

Pulmonary hypertension (PH) is a well described and clinically important complication in sarcoidosis. The epidemiology of sarcoidosis-associated pulmonary hypertension (SaPH) varies depending on the characteristics of the population analysed, but ranges from 3–75%, depending on method of diagnosis (*i.e.* echocardiography *versus* right heart catheterisation (RHC)) and severity of underlying sarcoidosis [1–4]. Elevation of pulmonary arterial pressure in sarcoidosis can occur *via* a number of mechanisms (figure 1) [5, 6] and, as such, SaPH has remained under group 5 (PH with unclear and/or multifactorial mechanisms) in the recent 6th World Symposium on Pulmonary Hypertension [7]. The breadth of pathophysiologic mechanisms that lead to PH is fairly unique to sarcoidosis, which makes SaPH an interesting but complicated entity.
